# Supplementary material for: Sensitive turn-on fluorescent detection oftartrazine based on fluorescence resonance energy transfer
Source: Royal Society of Chemistry journal article supplement (doi:10.1039/c1cc15959c), 2011-11-28
Supplement: c1cc15959c.pdf [file c1cc15959c.pdf]

## Electronic Supplementary Information (ESI) for Chemical Communications

# Sensitive turn-on fluorescent detection of tartrazine based on fluorescence resonance energy transfer

Sheng Tian Huang,<sup>a,b</sup> Yan Shi,<sup>a</sup> Nian Bing Li<sup>a\*</sup> and Hong Qun Luo<sup>a\*</sup>

<sup>a</sup> Education Ministry Key Laboratory on Luminescence and Real-Time Analysis, School of Chemistry and Chemical Engineering, Southwest University, Chongqing 400715, P. R. China.

<sup>b</sup> College of Chemistry and Pharmaceutical Engineering, Sichuan University of Science and Engineering, Zigong 643000, P. R. China.

\* Corresponding authors: linb@swu.edu.cn (N.B. Li); luohq@swu.edu.cn (H.Q. Luo)

## Materials and Chemicals

Graphite powders (325 mesh, spectral pure) were obtained from Sinopharm Chemical Reagent Co., Ltd., China. Tartrazine (Tz) was from TCI (Shanghai, China) Development Co., Ltd. The stock solution of Tz ( $5.10 \times 10^{-5} \text{ g mL}^{-1}$ ) was prepared by directly dissolving the commercial product in doubly distilled water and the required concentration of working solution was obtained by diluting the stock solution with doubly distilled water. Fluorescein (Fl) was commercially purchased from Shenyang No. 3 Chemical Reagent Factory (Shenyang, China). A  $4.40 \times 10^{-5} \text{ g mL}^{-1}$  stock solution of Fl was prepared by dissolving solid Fl in ethanol and the working solution was obtained by diluting the stock solution to  $2.20 \times 10^{-7} \text{ g mL}^{-1}$ . All other chemicals not mentioned here are of analytical reagent grade and are used as received. Water used throughout was doubly distilled.

## Preparation of Reduced Graphene Oxide

Graphene oxides (GO) were obtained through natural graphite powder according to the Hummers method,<sup>1</sup> and reduced graphene oxides (rGO) were synthesized by the chemical reduction of GO with hydrazine.<sup>2</sup> The successful synthesis of rGO has been characterized in our previous work.<sup>3</sup>  $35.91 \mu\text{g mL}^{-1}$  rGO dispersion was used.

## Pretreatment of Sample

A suitable amount of lemon-flavored sports drink was filtered through a  $0.2 \mu\text{m}$  pore size millipore filter, then 5.5 mL of the filtrate was extracted with ethyl acetate to get rid of some unknown food additives and it was repeated three times. Whereafter, the aqueous solution containing tartrazine was pretreated according to a salting-out assisted liquid–liquid

extraction method.<sup>4</sup> Briefly, 4.5 mL of acetonitrile was added in it for formation of a homogeneous solution. Then 2.500 g of  $(\text{NH}_4)_2\text{SO}_4$  was added, the mixture solution was shaken until the salt was dissolved, and then it was separated into two clear phases. The target **analyte** in the sample was extracted into the extraction solvent. Extraction was repeated three times. The extracts were **then** combined and heated **to remove acetonitrile**. Then the resulting residue was diluted to 5.0 mL with doubly distilled water for the determination of Tz.

### **Detection of Tartrazine**

150  $\mu\text{L}$  of  $0.20 \text{ mol L}^{-1}$  HAc-NaAc buffer solution, pH 5.03, 300  $\mu\text{L}$  of  $220.00 \text{ ng mL}^{-1}$  FI and 40  $\mu\text{L}$  of  $35.91 \text{ }\mu\text{g mL}^{-1}$  rGO solution were mixed thoroughly, then 50  $\mu\text{L}$  of working solution containing different concentrations of Tz was added, and the mixture was incubated at room temperature for 1 min. The fluorescence intensities (at 520 nm) of the mixture in the presence of Tz ( $I$ ) and absence of Tz ( $I_0$ ) were recorded, respectively. The fluorescence spectra of the mixture were recorded using a Hitachi F-2700 spectrofluorophotometer (Hitachi Ltd., Tokyo, Japan).

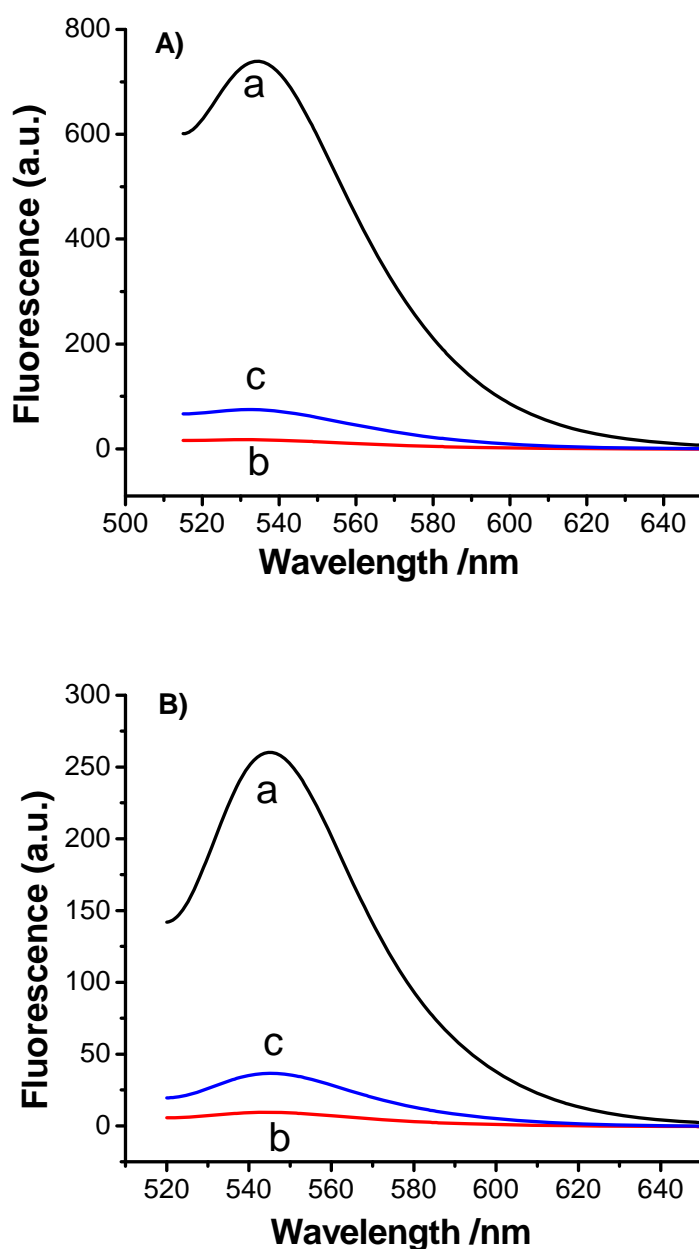

**Fig. S1** Fluorescence emission spectra: (A) DCFI (a), DCFI + rGO (b) and DCFI + rGO + Tz (c). Concentrations: DCFI ( $128.68 \text{ ng mL}^{-1}$ ), Tz ( $236.11 \text{ ng mL}^{-1}$ ), and rGO ( $1.09 \text{ } \mu\text{g mL}^{-1}$ ).  $0.20 \text{ mol L}^{-1}$  HAc–NaAc buffer, pH 5.03; reaction time: 1 min, excitation: 495 nm. (B) EY (a), EY + rGO (b) and EY + rGO + Tz (c). Concentrations: EY ( $129.16 \text{ ng mL}^{-1}$ ), Tz ( $236.11 \text{ ng mL}^{-1}$ ), and rGO ( $0.44 \text{ } \mu\text{g mL}^{-1}$ ).  $0.20 \text{ mol L}^{-1}$  HAc–NaAc buffer, pH 5.03; reaction time: 1 min, excitation: 500 nm.

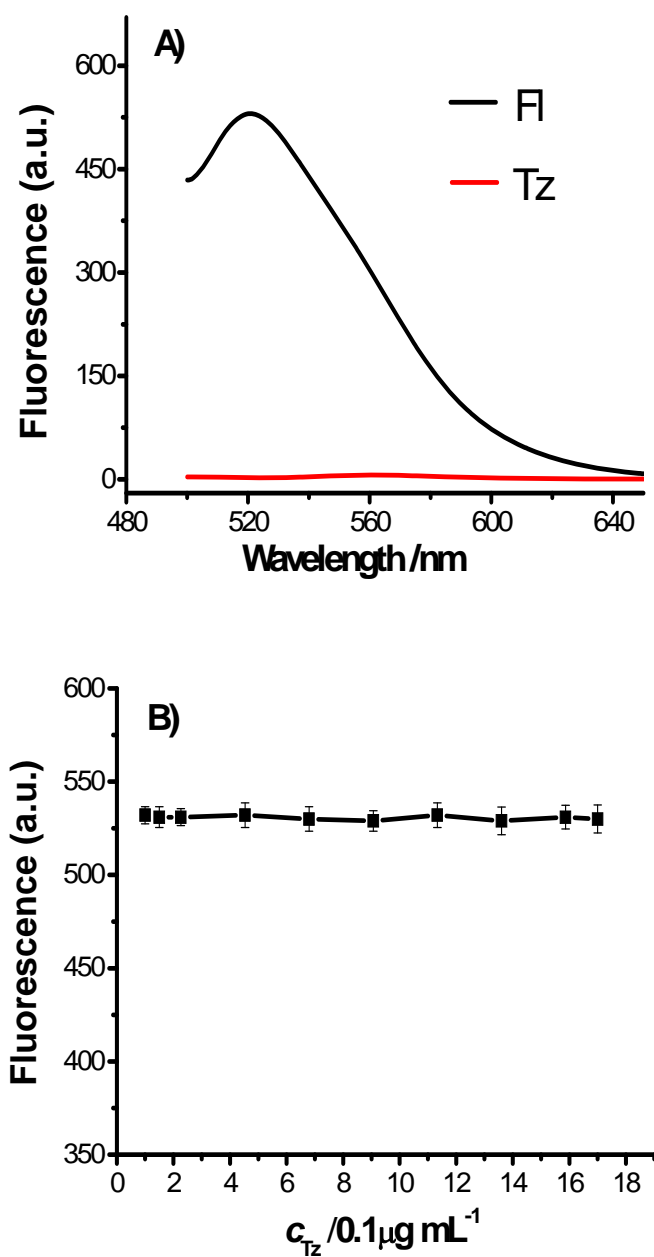

**Fig. S2.** (A) The fluorescence spectra of Fl and Tz. The concentrations of Fl and Tz were  $122.22 \text{ ng mL}^{-1}$  and  $1.59 \mu\text{g mL}^{-1}$ , respectively. (B) Effect of Tz concentration on the fluorescence of Fl. The concentration of Fl was  $122.22 \text{ ng mL}^{-1}$ ,  $0.20 \text{ mol L}^{-1}$  HAc–NaAc buffer, pH 5.03, reaction time: 1 min, excitation: 480 nm, emission: 520 nm.

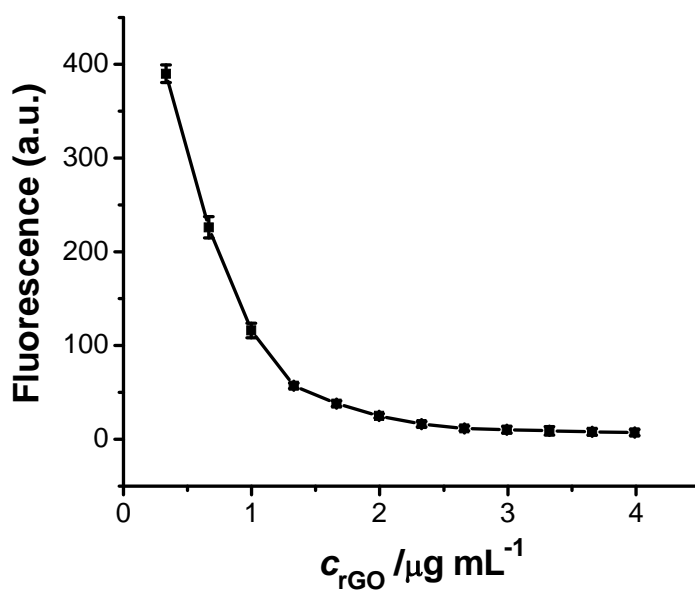

**Fig. S3.** Effect of rGO concentration on the fluorescence of Fl in the rGO-Fl system. The concentrations: Fl ( $122.22 \text{ ng mL}^{-1}$ ) and rGO ( $35.91 \text{ } \mu\text{g mL}^{-1}$ ).  $0.20 \text{ mol L}^{-1}$  HAc–NaAc buffer, pH 5.03, reaction time: 1 min, excitation: 480 nm, emission: 520 nm.

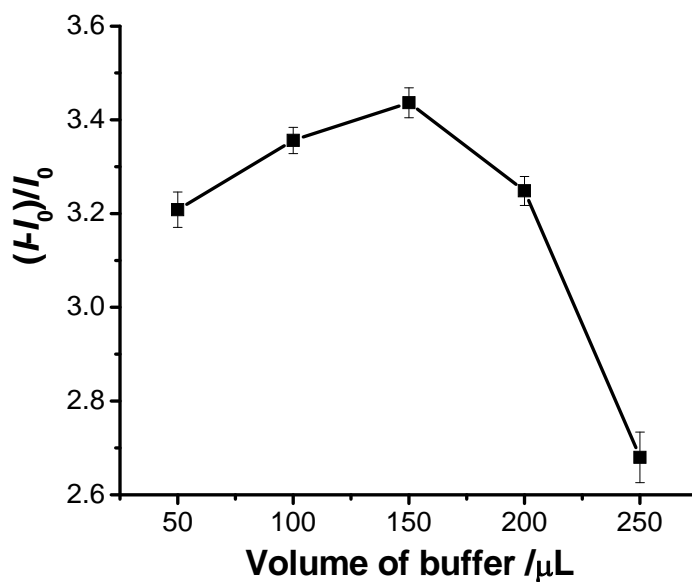

**Fig. S4.** Effect of the buffer volume on the FEE. Concentrations: Fl ( $122.22 \text{ ng mL}^{-1}$ ), Tz ( $212.50 \text{ ng mL}^{-1}$ ), and rGO ( $2.66 \text{ } \mu\text{g mL}^{-1}$ ),  $0.20 \text{ mol L}^{-1}$  HAc–NaAc buffer, pH 5.03, reaction time: 1 min, excitation: 480 nm, emission: 520 nm.

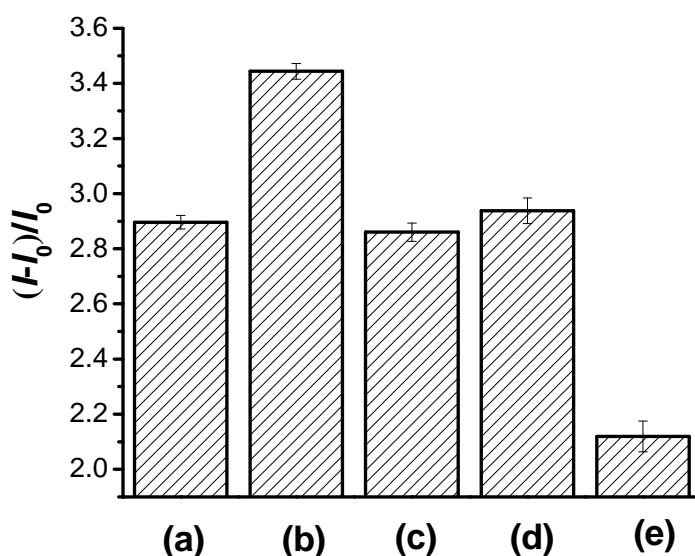

**Fig. S5.** Comparison of FEE for the five different reagent addition orders. buffer-FI-Tz-rGO (a), buffer-FI-rGO-Tz (b), buffer-Tz-rGO-FI (c), Tz-FI-rGO-buffer (d), and buffer-rGO-FI-Tz (e). Concentrations: FI ( $122.22 \text{ ng mL}^{-1}$ ), Tz ( $212.50 \text{ ng mL}^{-1}$ ), and rGO ( $2.66 \text{ } \mu\text{g mL}^{-1}$ ),  $0.20 \text{ mol L}^{-1}$  HAc–NaAc buffer, pH 5.03, reaction time: 1 min, excitation: 480 nm, emission: 520 nm.

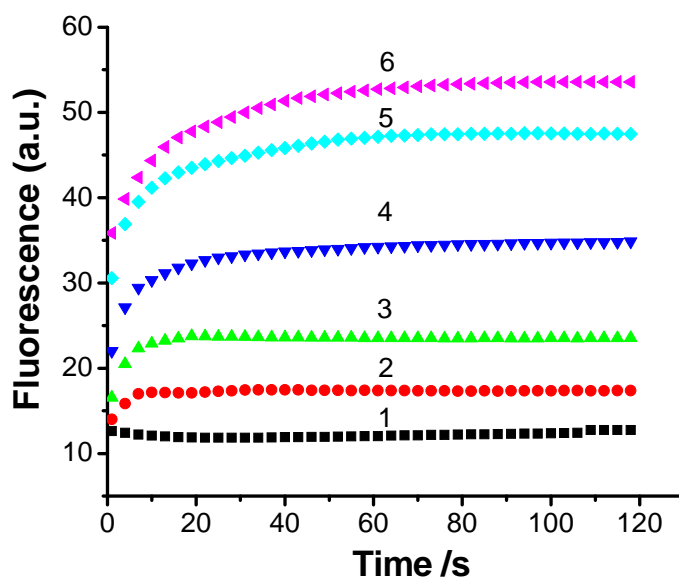

**Fig. S6** Kinetic study for the fluorescence change of the FI-rGO sensor in the presence of different concentrations of Tz: 0 (1), 18.89 (2), 61.39 (3), 118.06 (4), 188.89 (5) and 212.50 (6)  $\text{ng mL}^{-1}$ . FI ( $122.22 \text{ ng mL}^{-1}$ ) and rGO ( $2.66 \text{ } \mu\text{g mL}^{-1}$ ),  $0.20 \text{ mol L}^{-1}$  HAc–NaAc buffer, pH 5.03, excitation: 480 nm, emission: 520 nm.

**Table S1** Analytical results for Tz in lemon-flavored sports drink sample (n = 5)<sup>a</sup>.

| Sample | Found value<br>(ng mL <sup>-1</sup> ) | Standard added<br>(ng mL <sup>-1</sup> ) | Found value<br>(ng mL <sup>-1</sup> ) | Recovery<br>(%) | RSD<br>(%) |
|--------|---------------------------------------|------------------------------------------|---------------------------------------|-----------------|------------|
| 1      | 46.43                                 | 70.83                                    | 115.74                                | 97.9            | 1.9        |
| 2      | 46.43                                 | 89.72                                    | 140.08                                | 104.4           | 2.0        |
| 3      | 46.43                                 | 103.89                                   | 153.04                                | 102.6           | 2.4        |

<sup>a</sup> 2.00 mL of pretreated lemon-flavored sports drink sample was diluted 5-fold to detect Tz according to the procedure. Concentrations: Fl (122.22 ng mL<sup>-1</sup>), and rGO (2.66 µg mL<sup>-1</sup>). 0.20 mol L<sup>-1</sup> HAc–NaAc buffer, pH 5.03, excitation: 480 nm, emission: 520 nm.

### Supplementary references:

1. W. S. Hummers and R. E. Offeman, *J. Am. Chem. Soc.*, 1958, **80**, 1339.
2. (a) D. Li, M. B. Muller, S. Gilje, R. B. Kaner and G. G. Wallace, *Nat. Nanotechnol.*, 2008, **3**, 101. (b) Y. Xu, L. Zhao, H. Bai, W. Hong, C. Li and G. Shi, *J. Am. Chem. Soc.*, 2009, **131**, 13490.
3. (a) Y. Shi, W. T. Huang, H. Q. Luo and N. B. Li, *Chem. Commun.*, 2011, **47**, 4676. (b) W. T. Huang, Y. Shi., W. Y. Xie, H. Q. Luo and N. B. Li, *Chem. Commun.*, 2011, **47**, 7800.
4. R. S. Razmara, A. Daneshfar and R. Sahrai, *J. Ind. Eng. Chem.*, 2011, **17**, 533.
